# Supplementary material for: Brief Communication: Use of multicopter drone optical images for landslide mapping and characterization
Source: Copernicus journal article supplement (doi:10.5194/nhess-2017-46), 2017-02-13
Supplement: Supplementary file [file nhess-2017-46-AC1-supplement.pdf]

# Brief Communication: Use of multicopter drone optical images for landslide mapping and characterization

Guglielmo Rossi<sup>1</sup>, Luca Tanteri<sup>1</sup>, Veronica Tofani<sup>1</sup>, Pietro Vannocci<sup>1</sup>, Sandro Moretti<sup>1</sup>, Nicola Casagli<sup>1</sup>

5 <sup>1</sup>Department of Earth science, University of Florence, Via La Pira 4, 50121, Italy

*Correspondence to:* Veronica Tofani (veronica.tofani@unifi.it)

**Abstract.** The Department of Earth Sciences of Florence (DST) has developed a new type of drone airframe. Several survey campaigns were performed in the village of Ricasoli, in the Upper Arno river Valley (Tuscany, Italy) with the drone equipped with an optical camera to understand the possibility of this rising technology to map and characterize landslides.

10 The aerial images were combined and analysed using Structure from Motion (SfM) software. The collected data allowed an accurate reconstruction and mapping of the detected landslides. Comparative analysis of the obtained DTMs also permitted the detection of some slope portions being prone to failure and to evaluate the area and volume of the involved mass.

## 1 Introduction

Mapping and displacement monitoring of unstable slopes is a crucial tool for the prevention and assessment of hazards.

15 Remote sensing techniques are effective tools to obtain spatially-distributed information on landslide kinematics (Delacourt et al., 2007), and can be operational from spaceborne, airborne and ground-based platforms. The main advantage of monitoring using remote sensing techniques is the capability to acquire spatially continuous data, even with centimeter precision, that can be very useful when integrated with the conventional ground-based techniques (Tofani et al., 2012).

20 Nevertheless, remote sensing analysis performed using aerial and satellite platforms highlights some drawbacks, mainly high associated costs and the logistical challenge of conducting repeat surveys within a short time

In the last decade, the combination of the a rapid development of low cost and small Unmanned Aerial Vehicles (UAVs) alongside improved battery technology and the recent improvements of conventional sensors (Optical and LiDAR) in terms of cost and dimensions, has lead to new interesting applications in environmental remote sensing and surface modelling and monitoring with this equipment (Colomina and Molina, 2014; Travelletti et al., 2012; James and Robson, 2012; Remondino et al., 2011; Eisenbeiss and Sauerbier, 2011; Fabris and Pesci, 2005). As an important mean of obtaining spatially distributed data, UAV-based remote sensing has the following advantages: real-time applicability, flexible survey planning, high-resolution, low cost, and it can collect information in dangerous environments without risk (Chang Chun et al., 2011).

In the last few years UAVs, equipped with optical cameras to perform digital aerial photogrammetry, have been applied to study landslides (Balek & Blahut, 2015; Marek et al., 2015; Peternel et al., 2016; Mateos et al., 2016; Rossi et al, 2016).

Digital photogrammetry technique is, indeed, a technique that permits the reconstruction of topography as a 3D model using... "using algorithms that can provide 3D spatial information from features and elements visible in two or more images acquired from different points of view.

Once images are oriented and, possibly, calibrated with sensor and lens data, it is possible to obtain very high-definition point clouds (Colomina & Molina, 2014), along with Digital Surface Models (DSM), orthophotos and accurate 3D representation of objects or surfaces. This process is generally carried out using one of the numerous Structure-from-Motion (SfM) software packages, that can compute the 3D data from a series of overlapping, offset images (Westoby et al., 2012). SfM processing is based on specific algorithms for feature-matching and bundle-adjustment, allowing also to estimate automatically the internal camera corrective parameters.

The time and cost-effectiveness of the technique make it possible to repeat measurement surveys at regular time intervals to monitor the changes occurred between different acquisitions, by comparing the resulting digital models.

In this work a multicopter drone named *Saturn* developed by the research team of the Department of Earth Science at the University of Florence, equipped by a consumer-grade optical camera, is used to carry out photogrammetric data acquisition in an area close to the village of Ricasoli, in Tuscany (Italy) strongly affected by active landslides. Multiple photogrammetrical surveys were performed using the *Saturn* drone to provide multitemporal 3D models of the slope.

The aim of the work is to test the applicability and to validate the first preliminary results of the newly developed drone as well as to create high-resolution 3D surface models to better characterize and to monitor the landslides affecting the village.

## 2 Study site

Ricasoli is a small village located in the Upper Arno river Valley (Tuscany), an area strongly subjected to diffuse slope instability. The village is located in an intramontane basin with a NW-SE orientation, that has been formed during the extensional phase of the Neogene-Quaternary evolution of the Tyrrhenian side of the Northern Apennines (Abbate, 1983).

The substrate of the basin consists of two flysh-type formations: Cervarola-Falterona Unit on the eastern side and Macigno Formation on the western side. This substrate is overlain with fluvial-lacustrine sediments that were deposited in this area in three phases between Lower Pliocene and Upper Pleistocene (Fidolini et al., 2013).

From a geomorphological point of view, Ricasoli is located on topographic high made of fluvial-lacustrine sediments overlaid with fluvial sediments (figure 1). Fluvial-lacustrine sediments are mainly made of silts, clays and peaty clays (*Terranova Silt TER and Ascione Stream Clay, ASC*) while fluvial sediments are constituted by silts, sands and gravels (namely *Silt and Sand of Oreno Stream LSO, Casa La Loccaia Sands LOC, Latereto silt LAT*) (Rosi et al., 2013).

The slopes surrounding the hill of Ricasoli are affected by numerous landslides, which cause the retreat of escarpments near the village, affecting community infrastructure and buildings.

Different types of landslides affect the village of Ricasoli. Falls with topples, and shallow landslides affect the slopes surrounding the village. These landslides consist of sands and sandy silts with high slope angles. Moving downslope the

cohesive soils substitute granular materials and slope angle decreases and, compound rotational slides develop (Figure 1). The diffuse sliding phenomena, generally triggered by heavy and continuous rainfall, are causing a progressive retreat of the escarpments.

Since 2004 several monitoring instruments have been installed with inclinometers, extensometers and, crackmeters in the buildings of the village. Simultaneous to the installation of these instruments terrestrial laser scanner (TLS) surveys have been carried out.

In 2014 consolidation works have been realized in the northern flank of the village that according to the monitoring results is the more active. In particular, slope reshaping and consolidation using wooden poles have been used.

The study is particularly focused on the eastern part of northern slope, where two new shallow landslides occurred respectively on March the 1<sup>st</sup> (Landslide 1, LS1) and March 30<sup>th</sup> 2016 (Landslide 2, LS2) subsequent to heavy rainfall (Figure 2) involving a portion of the superficial recent landfill and underlying in situ soil formations.

### 3 Materials and methods

#### 3.1 The multicopter drone

The more commonly used multicopter drones have a “spider” structure with a central body, containing the flight control units, and a variable number of radial arms, that supports the engine.

Aimed at improving the structure of the existing multicopters, the Department of Earth Sciences of Florence (DST) has developed a new type of airframe that overcomes some critical issues in carrying scientific and heavy payload or in applications requiring long flight autonomy (Figure 3a). It is an innovative circular shaped airframe that fully supports flight dynamics (Figure 3a), currently patented in Italy, protected by PCT (Patent Cooperation Treaty) valid in 117 countries and patent pending in the USA and all Europe countries.

The drone, named *Saturn*, has several key features including:

- Increased space without constraints to positioning electronics, flight system, and instruments.
- The central payload area can be connected in a rigid manner or with a flexible mount to dramatically dampen mechanical vibrations from the propulsion system without compromising flight dynamics and performance.
- Maximized flexibility of propulsion configuration: without any modifications to the airframe it is possible to vary the number of propulsion systems (three, four, six etc..) even during the flight. The flexible propulsion configuration allows us to fit the need of every single mission: less engine to increase autonomy, more engine to allow for heavy payload.
- Variable propulsion geometry to keep the perfect balance with all types of payloads and to manage an emergency landing in case of a propulsion unit failure.
- Completely water-resistant electrical and electronic systems to fly during any weather condition.

The *Saturn* drone is capable of autonomous flight, from take-off to landing, and emergency management. The autopilot software is completely programmable and configurable.

*Saturn* drone has onboard a complete and fully configurable acquisition system with frame grabber for scientific instruments. The drone is a “light” UAV class (< 25 kg take off weight), can hover until 30 minutes and, have a useful load of 10 kg.

5

### 3.2 Digital photogrammetric surveys

Three aerial photogrammetric surveys were performed (see Table 1), respectively on July 30<sup>th</sup>, 2015, March 2<sup>nd</sup>, 2016 and April 6<sup>th</sup>, 2016 using the DST drone *Saturn*, equipped with a Sony digital RGB camera with 8 MP resolution, mounted on a gimbal fully designed and assembled *ad-hoc* by the research team of the Department of Earth Science.

10 The photogrammetric surveys were performed in 5 different stages: (1) mission planning, (2) acquisition of ground control points with GPS, (3) flight and image acquisition, (4) point-cloud processing and refinement and (5) implementation in GIS environment (Figure 3).

The first stage consists in the flight planning, that must ensure the best coverage of the target area with an optimal photo overlap in frontal (overlap) and lateral direction (sidelap), considering the camera footprint at the desired flight altitude  
15 (Figure 3b). To optimise flight time, spatial coverage and, ground resolution the multicoper was programmed to fly at a constant altitude of approximately 70 m a.g.l. from the top of the slope, with side overlap and front overlap respectively set to 50% and 60% in order to guarantee optimal conditions for the tie-points detection algorithm and camera alignment (bundle adjustment).

The position of objects on the ground that can be easily recognized in the aerial photos were measured with a GPS (Leica  
20 1200 series) and used as Ground Control Points (GCPs) (Figure 3c ): a special care was taken to have a homogeneous spatial distribution of GCPs on the scene. The images were processed using Agisoft Photoscan Professional (Agisoft LLC, 2016) software and the resulting data were implemented in GIS environment using the ESRI ArcGIS package. (Figure 3d and Figure 3e).

Nevertheless, the scene was mainly characterized by low vegetation and grass and it was decided to integrate natural CGPs  
25 with some artificial markers, placed on the ground prior to each flight and georeferenced with centimeter accuracy (generally an average value of 0.03 m RMSE in XYZ).

The original point clouds were opportunely filtered using Photoscan tools. This was done to detect and remove points that corresponded with vegetation and needed to be removed to compare with the other survey dates. This step was necessary since the grass growth generated an irregular positive offset of 20-40 centimeters, along the whole scene, between the first  
30 and the third survey.

The ground image coverage obtained by the aerial survey is shown in Figure 3b; the maximum coverage is in correspondence of the lower part of the escarpment where every point of the scene is visible in more than 9 images.

Further details on the aerial survey are reported in Table 1.



The resulting digital orthomosaics were processed at a ground resolution of ~5 cm/pix and the 3D point clouds were composed by up to 100 million points (Figure 3d). Furthermore, high-resolution DTMs (0.05 m/pix) were obtained by using the point clouds, appropriately filtered to remove all the points processed on buildings, unwanted elements on the scene, and high vegetation.

## 5 4. Results

The data collected in the three photogrammetric surveys were analyzed and compared each other in order to assess the precision of the resulting digital models and to detect areas affected by instability processes.

The comparison was performed using both the orthomosaics resulting by the photogrammetric processing and DTMs derived by the point clouds.

- 10 The DTMs were compared to detect any morphological change between the three acquisitions, permitting to characterize the landslide and, in addition, to precisely point out geomorphological features of landslide-prone areas on the slope.

The result of the first aerial survey carried out on July the 30<sup>th</sup>, 2015 shows an incipient deformation on the ground surface (yellow dashed circle in Figure 4a) on the eastern part of the slope. During a preliminary survey, we assessed that such part of the slope was stabilized only using wooden poles, anchored at a low depth, that appeared bended downslope, with tension

- 15 cracks and a little sink uphill. This incipient movement phenomenon is indicated as pre-existing LS1 in Figure 4a. No other indicators of ongoing movement were detected on the remaining part of the northern slope during the first flight.

As a consequence of intense rainfall occurring during February 2016, the area that was recognized as potentially unstable by the first survey was involved in a shallow landslide, affecting a portion of the slope with an overall extent of 1250 m<sup>2</sup> (LS1 in Figure 4b).

- 20 The comparison between the first and second survey DTMs carried out on March the 1<sup>st</sup> 2016 (Figure 4d)) highlights respectively the detachment, the transport and the deposition areas of LS1, and an appreciable displacement with the development of two new scarps on the eastern part of the slope (2a and 2b in Figure 4d). The two scarps indicate a new landslide that involved a portion of a private property nearby. This landslide (LS2) eventually occurred in March the 9<sup>th</sup>, 2016 after a few days of intense rainfall and appears visible when comparing the DTMs of the second and third survey that
- 25 was carried out on April the 6<sup>th</sup>, 2016.

The evolution of the superficial topography was also studied by extracting surface profiles along two selected sections (AA' and BB' as shown in Figure 4).

The longitudinal profiles (Figure 4) show the general geometry of the landslides. In the detachment area LS1 is characterized by a nearly planar slip-surface with an average depth of 60-70 cm from the original topography. LS1 is also visible in the

30 detachment area, has an extent of 480 m<sup>2</sup>, and involves mostly a superficial level of artificial landfill that was put in place during previous slope stabilization works.

Furthermore, within LS1 a new scarp was detected by comparing the DTMs of the second and third surveys (scarp *Id* in Figure 4). This scarp was also verified during a field survey and it partially delimits a secondary slope movement that involves the lower part of the landslide LS1. The movement of this portion was observed through a comparison between the DTMs and the orthophotos, with average superficial displacement of 0,6 meters along the slope and resulted in an advancement of the landslide toe of around 50 mm, as measured during a field inspection.

Substantial changes in elevation of up to 0,6 meters are visible only in the part immediately downslope of the scarp *Id* (Figure 4f). The rest of the moving portion do not show appreciable elevation differences.

The extent of such a secondary landslide is  $\sim 430 \text{ m}^2$ , and it is characterized by a planar translational type of movement (Varnes, 1978) with an average thickness of  $\sim 0,5\text{-}0,6 \text{ m}$ , also involving part of the antecedent LS1 deposits.

The LS2, as visible from the BB' profile in Figure 4, has a different geometry. In fact, it was composed of two roto-translational landslides that evolved into flow type landslides, creating a deposition area at the slope toe.

Thanks to the DEMs comparison it has been possible to estimate the total extent and volume, both including detachment and depositions zones, of LS1 and LS2. Extents for LS1 and LS2 are, respectively,  $1250 \text{ m}^2$  and  $320 \text{ m}^2$  while volumes are  $480 \text{ m}^3$  and  $70 \text{ m}^3$  respectively.

## 5. Discussions

The aim of the work was to test the applicability and evaluate the potential use of drones, in this case equipped with a commercial RGB camera to detect and possibly monitor mass movement on slopes. The comparison between the obtained DTMs provided the means for the mass movements on the northern slope of Ricasoli to be characterized in great detail.

Although this is preliminary work, focused on a small area, it was sufficient to point out some advantages and drawbacks of the technique.

One advantage is the potential repeatability of the surveys in a relatively short time and with high resolution, especially when compared to other techniques such as Terrestrial Laser Scanning, and low cost. Indeed, in most of cases in-situ visually distinguishable ground features found in the imagery can be easily used as GCPs while at least a few artificial reflectors must be installed for a TLS survey, a time-consuming procedure that must be repeated every time.

remote sensing surveys using a drone allows the acquisition of high resolution imagery over wide areas in a short time and reducing the “shaded areas”. The total time for the survey in the area covered (around  $0,02 \text{ km}^2$ ) is about 40 minutes including flight planning and GCPs acquisition with GPS. Moreover, it allows immediate processing to create an aerial orthomosaic, very useful for visual inspections, characterization and mapping of the detected phenomena even in emergency contexts.

This work pointed out one of the most important drawbacks of this kind of aerial photogrammetric applications with challenge of filtering (removal of) vegetation points to obtain an accurate representation of the “bare earth” when creating SfM 3D models.

The vegetation is generally removed from the resulting point clouds using automatic filtering algorithms (Brodu et al. 2012) that could be based on the relative position between the points within a certain distance at a certain scale, on the RGB values or, at least, manually. The application of such techniques and automatic algorithms is often effective when using laser scanning data, thanks to the capability of the laser beams to penetrate the vegetation foliage, but less effective on photogrammetric point clouds, especially in presence of dense and uniform coverage. As seen in this work, the result of this effect is the inability to accurately reconstruct the terrain features below a dense grass coverage on the slope, increased from the first survey (July 2015) to the last one. Figures 4b and 4c show how there was a significant growth of grass between the first and the second and third surveys. In the second and third surveys the slope was covered by a dense grass blanket that prevented the triangulation of points corresponding to the surface below. This change in grass growth resulted in a diffuse increase in altitude in all the grassy areas (from 20 to 30 cm) and is visible from the DEM comparison. Removing these points would have led to widespread holes in the 3D model. On the other hand, isolated trees and sparser vegetation are generally easily removed by applying automatic filters and manual refinement. In this case, as well as leading to an uncertain volume calculation, such vegetation effect did not allow the detection of fissures and other features of the ground, useful for precise landslide delimitation and characterization.

However, the detrimental effects of vegetation on the precision of the model could be reduced with the use of a high-quality camera with higher resolution equipped with low distortion lens, avoiding fish-eye effects.

Generally, although pointing out the good potential of drone applications for mapping and characterization of rapid kinematic landslides, this work highlighted a strong need for a higher frequency of surveys and for the integration with other monitoring techniques, due to the temporal discontinuity of measurements.

A future development will regard the execution of further drone surveys, also using different types of sensors and the application of software that permit to reconstruct the displacement vectors, based on the acquired point clouds, DTMs or on the RGB images.

## 6. Conclusions

In the last decade, the combination of rapid development of low cost small Unmanned Aerial Vehicles (UAVs), improved battery technology, and conventional sensors (Optical and LiDAR) in terms of cost and dimensions, have led to new opportunities in environmental remote-sensing and 3D surface modelling. The Department of Earth Sciences at the University of Firenze has developed a new drone airframe that overcomes some critical issues for scientific and heavy payload or long flight applications. This drone has been equipped with an optical camera and it has been used to perform photogrammetric data acquisition in an area close to the village of Ricasoli, in Tuscany (Italy). The aim of this work was to test the use of aerial images taken from a multicopter for landslide detection and characterization. The images acquired during the aerial surveys allowed us to obtain a continuous 3D surface model of the studied area using a photogrammetric approach.

The detection of possible displacements occurred in the covered area between three aerial surveys was performed by comparing the different Digital Terrain Models and point clouds. As a result, two mass movements were detected and characterized, namely LS1 and LS2, affecting the northern slope of Ricasoli village, and a new incipient phenomenon in the lower part of LS1.

- 5 The drone survey has proven to be an easier and more cost- and time- effective approach with respect to traditional landslide monitoring. Thanks to these potentialities and to its repeatability, drone surveys will become an integral part of the monitoring system in Ricasoli village.

### Acknowledgements

This work was carried out to evaluate the potentialities of the new Saturn drone, entirely designed and developed at the Department of Earth Sciences of the University of Florence. Among the personnel of the department, the authors want to gratefully thank Gabriele Scaduto and Teresa Salvatici for the logistical support during the surveys in Ricasoli. Moreover, heartfelt thanks to Massimiliano Nocentini and Luca Lombardi, for the precious historical information about slope instability in Ricasoli.

### References

- 15 Aman, A. A. and Bman, B. B.: The test article, *J. Sci. Res.*, 12, 135–147, doi:10.1234/56789, 2015.  
Aman, A. A., Cman, C., and Bman, B. B.: More test articles, *J. Adv. Res.*, 35, 13–28, doi:10.2345/67890, 2014.  
Abbate E.: *Fluvial-Lacustrine Deposits of the Upper Valdarno*. C.N.R., Firenze, 1983.  
Agisoft LLC: Agisoft PhotoScan Professional v. 1.2.4, available at <http://www.agisoft.com/>  
Balek J, Blahut J.: A critical evaluation of the use of an inexpensive camera mounted on a recreational unmanned aerial  
20 vehicle as a tool for landslide research. *Landslides*, first online, 2016.  
Brodu N and Lague D.: 3D terrestrial lidar data classification of complex natural scenes using a multi-scale dimensionality criterion: Applications in geomorphology. *ISPRS Journal of Photogrammetry and Remote Sensing* 68: 121–134, 2012  
Chang-Chun L., Guang-Sheng Z., Tian-jie L., A-du G.: Quick image-processing method of UAV without control points data in earthquake disaster area. *Trans. Nonferrous Met. Soc. China* 21: 523-528, 2011.  
25 Colomina I., Molina P.: Unmanned aerial systems for photogrammetry and remote sensing: A review. *ISPRS Journal of Photogrammetry and Remote Sensing*, 92: 79–97, 2014.  
Cruden D. M. and Varnes D.J.: *Landslide Types and Processes*. A. K. Turner and R. L. Schuster, Eds., *Landslides: Investigation and Mitigation*: Sp. Rep. 247, National Academy Press, Washington DC, pp. 36- 75, 1996.  
Delacourt C., Allemand P., Berthie, E., Raucoules D., Casson B., Grandjean P., Pambrun C., Varel E.: Remote-sensing  
30 techniques for analysing landslide kinematics: a review. *Bulletin de Societe Geologique* 178 (2): 89–100, 2007.

- Eisenbeiss H. and Sauerbier M.: Investigation of uav systems and flight modes for photogrammetric applications. *The Photogrammetric Record* 26(136): 400–421, 2011.
- Fabris M. and Pesci A. :Automated DEM extraction in digital aerial photogrammetry: precisions and validation for mass movement monitoring” *Annals of Geophysics*, 48 (6), 2005.
- 5 James M. R. and Robson S. : Straightforward reconstruction of 3D surfaces and topography with a camera: Accuracy and geoscience application. *Journal of Geophysical Research*, 117, f03017, doi:10.1029/2011jf002289, 2012.
- Marek L., Miřijovský J., Tuček P. : Monitoring of the Shallow Landslide Using UAV Photogrammetry and Geodetic Measurements. In: Lollino G. et al. (eds) *Engineering Geology for Society and Territory - Volume 2*. Springer, 2015.
- Mateos R.M., Azañón J.S., Roldán F.J., Notti D., Pérez-Peña V., Galve J.P., Pérez-García J.L., Colomo C.M., Gómez-López J.M., Montserrat O., Devantèry N., Lamas-Fernández F., Fernández-Chacón F.: The combined use of PSInSAR and UAV photogrammetry techniques for the analysis of the kinematics of a coastal landslide affecting an urban area (SE Spain). *Landslides*, first online, 2016.
- 10 Peternel T., Kumelj S., Ostir K., Komac M.: Monitoring the Potoška planina landslide (NW Slovenia) using UAV photogrammetry and tachymetric measurements. *Landslides*, first online, 2016.
- 15 Remondino F., Barazzetti L., Nex F., Scaioni M., Sarazzi D.: Uav photogrammetry for mapping and 3d modeling - current status and future perspectives-. *International Archives of the Photogrammetry, Remote Sensing and Spatial Information Sciences*, Volume XXXVIII-1/C22, 2011, ISPRS Zurich 2011 Workshop, 14-16 September 2011, Zurich, Switzerland, 2011.
- Rosi A., Vannocci P., Tofani V., Gigli G., Casagli N.: Landslide Characterization Using Satellite Interferometry (PSI), *Geotechnical Investigations and Numerical Modelling: The Case Study of Ricasoli Village (Italy)*, *International Journal of Geosciences*, 4: 904-918, 2013
- 20 Rossi G., Nocentini M., Lomabrdi L., Vannocci P., Tanteri L., Dotta G., Bicocchi G., Scaduto G., Salvatici T., Tofani V., Moretti S., Casagli N.: Integration of multicopter drone measurements and ground-based data for landslide monitoring. *Landslides and Engineered Slopes. Experience, Theory and Practice – Aversa et al. (Eds)*, 2016.
- 25 Tofani V., Segoni S., Agostini A., Catani F., Casagli N.: Technical note: Use of remote sensing for landslide studies in Europe. *Nat. Hazards Earth Syst. Sci.*, 13, 1–12, 2013.
- Travelletti J., Delacourt C., Allemand P., Malet J. P., Schmittbuhl J., Toussaint R., Bastard M., Correlation of multi-temporal ground-based optical images for landslide monitoring: Application, potential and limitations *ISPRS Journal of Photogrammetry and Remote Sensing* 70, 39–55, 2012.
- 30 Varnes D.J.:Slope movement types and processes. *Transportation Research Board Special Report*, 176, 1978.
- Westoby M.J., Brasington J., Glasser N.F., Hambrey M. J., Reynolds J.M.: ‘Structure-from-Motion’ photogrammetry: A low-cost, effective tool for geoscience applications. *Geomorphology*, 179: 300-314, 2012

Figures

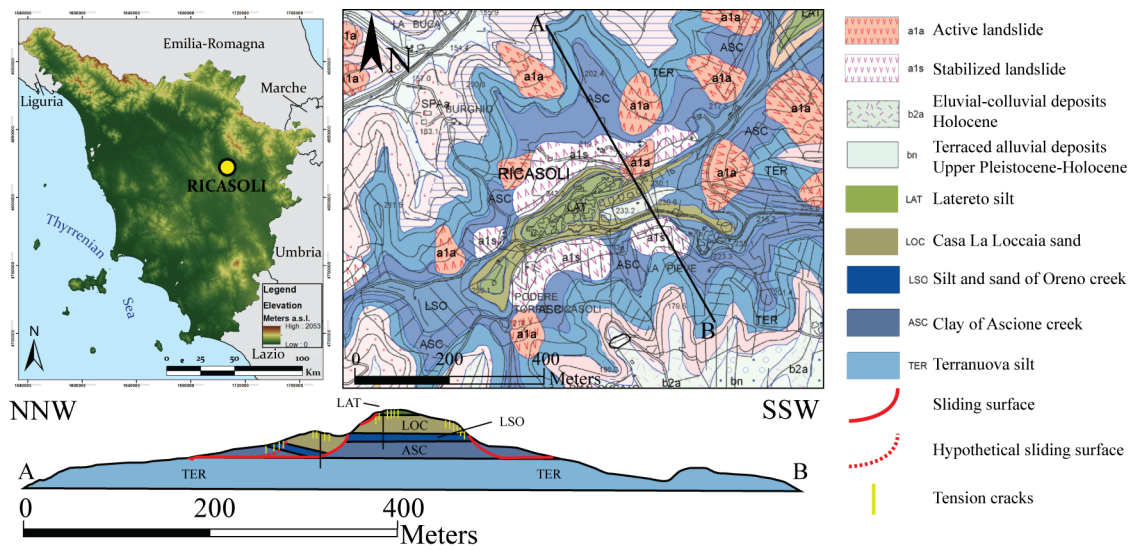

Figure 1: Location, geological map and, geological cross section of Ricasoli village (modified after Rosi et al. 2013)

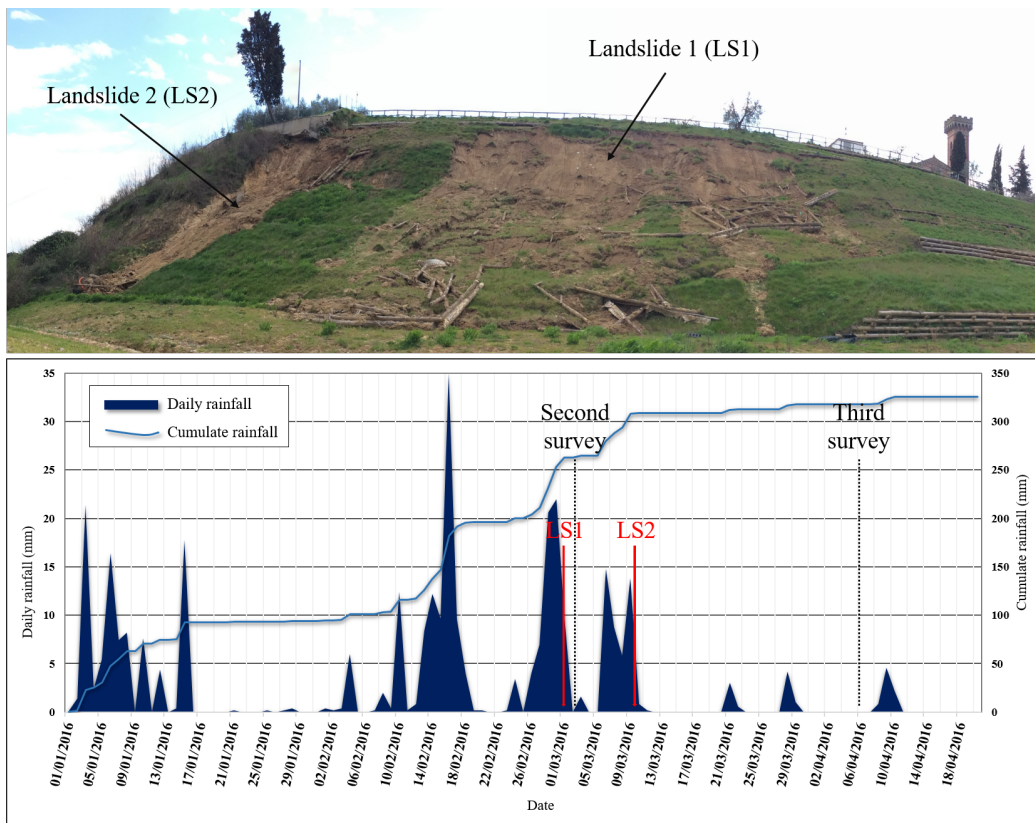

**Figure 2: Panoramic view of the portion of the northern slope of Ricasoli affected by the landslides. The plot below shows the cumulated rainfall registered by a nearby rain gauge, from January the 1<sup>st</sup> 2016 to April the 21<sup>st</sup> 2016, along with the occurrence of the two landslides. UAV surveys dates are marked as dashed black lines.**

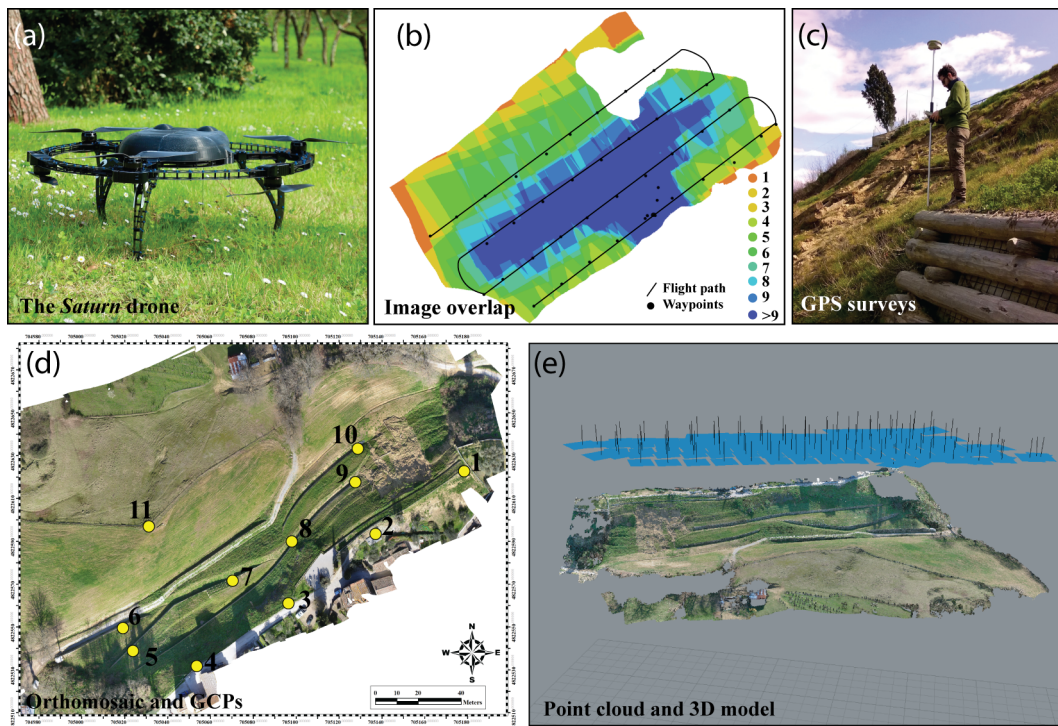

Figure 3: The *Saturn* drone designed and built by the Department of Earth Science of the University of Florence (a) and stages of photogrammetrical surveying: flight planning; (b) GPS acquisition (c,d), point cloud processing (e).



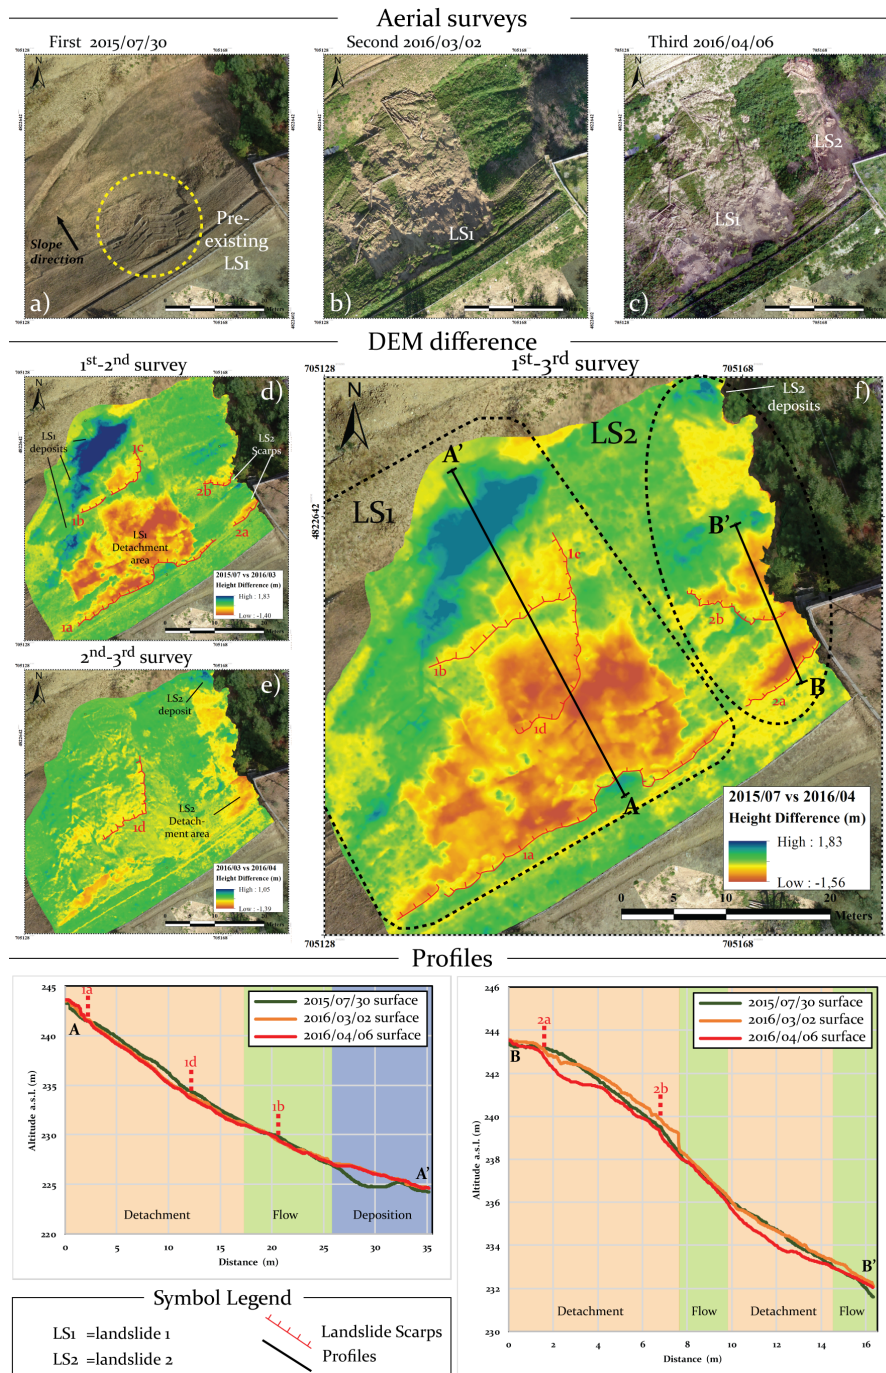

**Figure 4: Orthophotos of the area affected by the landslides (a, b, c) and DEM differences among different acquisitions (d, e, f). At the bottom are topographical profiles obtained from the three raster surfaces with location of the main scarps. The colours indicate the different zones of the landslides: detachment, flow, and deposition.**

5 **Table 1: Data related to the three different surveys.**

|                                    | MULTICOPTER DRONE SURVEYS |                        |                        |
|------------------------------------|---------------------------|------------------------|------------------------|
|                                    | July 2015                 | March 2016             | April 2016             |
| Number of images                   | 58                        | 106                    | 45                     |
| Average flying altitude (m.a.g.l.) | 70,6                      | 70,3                   | 69,7                   |
| Ground resolution (m/pix)          | 0.019                     | 0,02                   | 0,019                  |
| Number of GCPs                     | 12                        | 18                     | 5                      |
| Coverage area (km <sup>2</sup> )   | 0.0186                    | 0.0186                 | 0,0151                 |
| Number of tie-points               | 9328                      | 14690                  | 31910                  |
| Number of projections              | 52527                     | 96102                  | 160217                 |
| Overall Error in XY (m)            | 0,0741                    | 0,0475                 | 0,0595                 |
| Overall Error in Z (m)             | 0,0791                    | 0,0115                 | 0,0221                 |
| Overall Error (m)                  | 0,1085                    | 0,0489                 | 0,0635                 |
| Overall Error (pix)                | 0.91                      | 0,07                   | 0,77                   |
| Processed points                   | 10 <sup>8</sup>           | 9,96 x 10 <sup>7</sup> | 4,11 x 10 <sup>7</sup> |
| Orthomosaic resolution (m/pix)     | 0.02                      | 0.02                   | 0.02                   |
| DEM resolution (m/pix)             | 0.02                      | 0.02                   | 0.02                   |
